# Supplementary material for: Understanding public interest and needs in health policies through the application of social network analysis on a governmental Facebook fan page
Source: Springer Nature journal article supplement (doi:10.1186/s12889-020-09420-y), 2020-09-07

# MoHW administrative organization chart (2017)

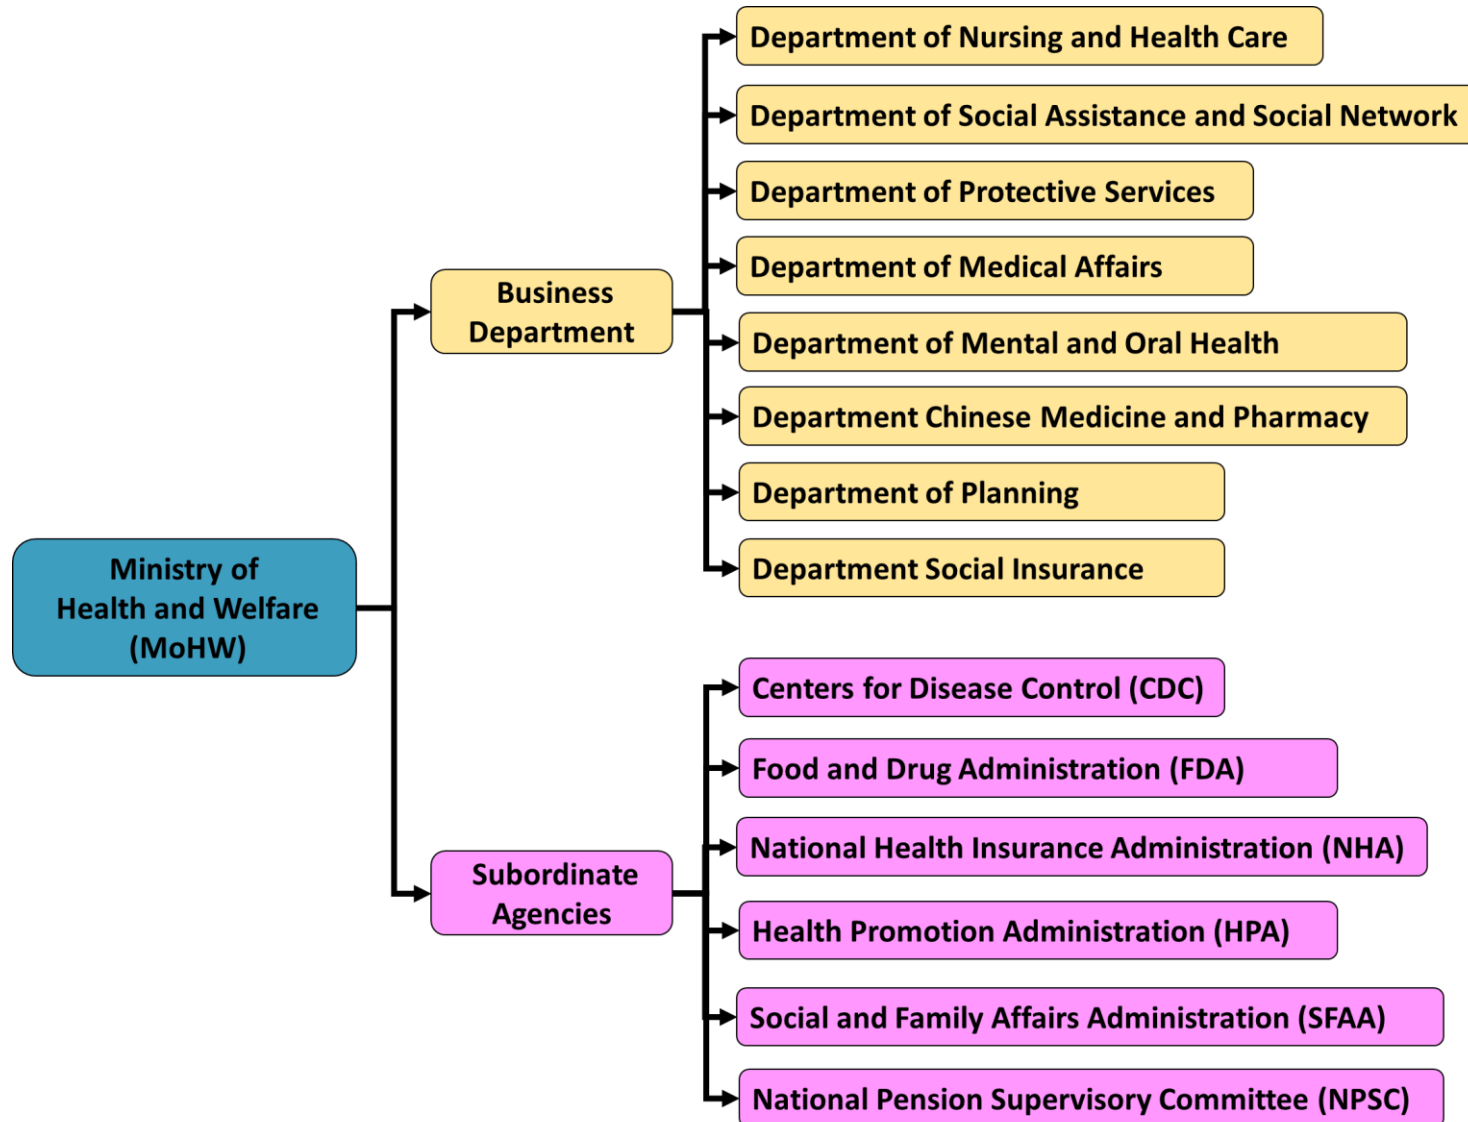

Supplement: MOESM1 [file 18355092]
